# Supplementary material
Source: MDPI journal article supplement (https://www.mdpi.com/1424-8247/16/5/738)
Supplement: s1 [file s1]

The HPLC chromatogram is currently included in Supplementary Material, as below.

**Figure S1. HPLC Chromatogram of *Angelica keiskei* Extract**

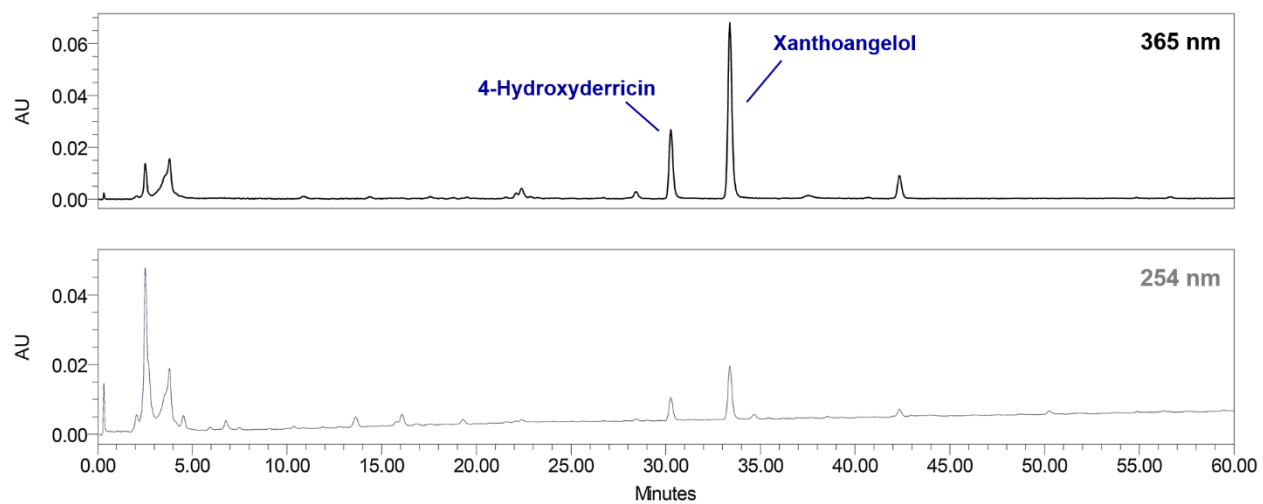

*Angelica keiskei* is characterized mainly by its two major components of (4-hydroxyderricin and xanthoangelol) that appear in this chromatogram.
